# Supplementary material
Source: PubMed Central journal article supplement (PMC3313511)
Supplement: gmb-35-1-191-gfigsuppl2.pdf [file gmb-35-1-191-gfigsuppl2.pdf]

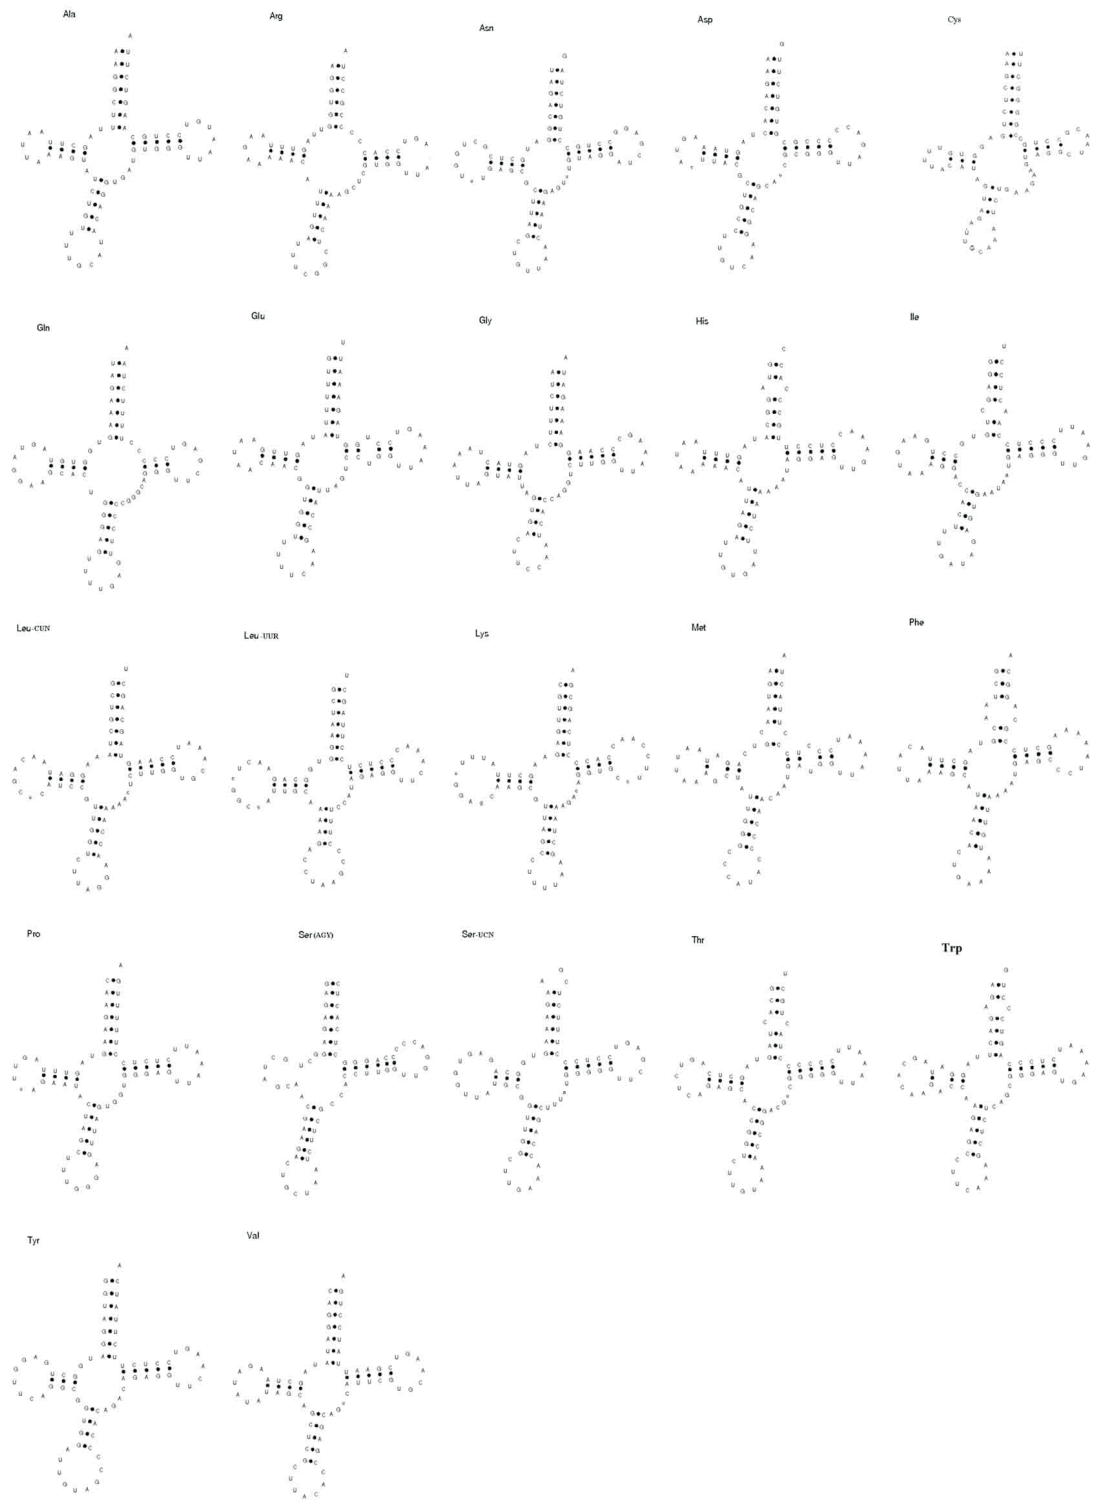

Figure S2 - Sequences of *L. polyactis* mitochondrial tRNA genes, represented in the clover-leaf form.
