# Supplementary material
Source: PubMed Central journal article supplement (PMC3313511)
Supplement: gmb-35-1-191-suppl1.pdf [file gmb-35-1-191-suppl1.pdf]

Table S1 - PCR primers in the analysis of the *L. polyactis* mitochondrial genome

| Primer | Sequence (5'-3')        |
|--------|-------------------------|
| 1F     | TAGAGGCATTTAGGCACAAGGT  |
| 1R     | TTCTGTTTATTAGAGCGGAGGC  |
| 2F     | AACCAACCATAGCCCACGACA   |
| 2R     | ATTCATTTCCCAGGCAACCAG   |
| 3F     | ATAAAGACCCGTATGAATGGC   |
| 3R     | ATGAGCGGTAAGATAGCAAGG   |
| 4F     | CCCTCCAACCTCCTTAGAAAAG  |
| 4R     | GGTGACCGAAGAATCAGAATA   |
| 5F     | GACATTGGCACCCCTCTATCTAA |
| 5R     | AGGCAAGGTCTTCGTAATCAGT  |
| 6F     | ACTTCTTCACTTTCACGACCA   |
| 6R     | AGAGTCAAACGACATCTACGA   |
| 7F     | TCATCATCGGCTCTACATTCCTG |
| 7R     | GGCGAGACTGGCAATAAATCATC |
| 8F     | TATGGCGTTCACCTCTGACTTC  |
| 8R     | TTGATTGAGCCCGATGGTTACT  |
| 9F     | CAACTGGCAAATCAGCACAA    |
| 9R     | TTACAAGGAGAAAGAGCACGAC  |
| 10F    | GACTTGAAAAACCACCGTTG    |
| 10R    | CTCCGATCTCCGGATTACAAGAC |
| 11F    | TGATACTTCCTATTTCGCCTAC  |
| 11R    | TCAGATGACAAAGCCACAG     |
