# Supplementary material
Source: PubMed Central journal article supplement (PMC3313511)
Supplement: gmb-35-1-191-suppl2.pdf [file gmb-35-1-191-suppl2.pdf]

Table S2 - Base compositions of the *L. polyactis* mitochondrial genome

|                 | A    | C    | G    | T    | A+T  |
|-----------------|------|------|------|------|------|
| Protein         |      |      |      |      |      |
| 1st             | 25.9 | 29.0 | 25.3 | 20.0 | 45.9 |
| 2nd             | 18.2 | 27.7 | 13.8 | 40.0 | 58.2 |
| 3rd             | 30.2 | 40.5 | 8.5  | 21.0 | 51.2 |
| Total           | 24.8 | 32.4 | 15.9 | 26.9 | 51.7 |
| tRNAs           | 27.4 | 21.5 | 24.0 | 27.1 | 54.5 |
| rRNAs           | 32.6 | 26.7 | 20.4 | 20.3 | 52.9 |
| Control region  | 32.2 | 23.2 | 15.0 | 29.6 | 61.8 |
| Complete genome | 27.6 | 31.2 | 16.2 | 25.0 | 52.6 |
