# Supplementary material
Source: PubMed Central journal article supplement (PMC3313511)
Supplement: gmb-35-1-191-suppl3.pdf [file gmb-35-1-191-suppl3.pdf]

Table S3 - Comparison of predicted initiation and termination condons of the 13 mitochondrial protein-coding genes among 23 species of Percoidaei.

| Gene | Predicted initiation codon and termination codon |         |         |         |         |         |         |         |         |         |         |         |         |
|------|--------------------------------------------------|---------|---------|---------|---------|---------|---------|---------|---------|---------|---------|---------|---------|
|      | ATPase6                                          | ATPase8 | COI     | COII    | COIII   | Cytb    | ND1     | ND2     | ND3     | ND4     | ND4L    | ND5     | ND6     |
| 1    | ATG/TA-                                          | ATG/TAA | ATG/AGA | ATG/T-- | ATG/TA- | ATG/TAA | ATG/TAG | ATG/TA- | ATG/T-- | ATG/T-- | ATG/TAA | ATG/TAA | ATG/TAA |
| 2    | ATG/TAA                                          | ATG/TAA | ATG/AGA | ATG/T-- | ATG/TA- | ATG/T-- | ATG/TAG | ATG/TA- | ATG/T-- | ATG/T-- | ATG/TAA | ATG/TAA | ATG/TAA |
| 3    | ATG/TAA                                          | ATG/TAA | ATG/AGA | ATG/T-- | ATG/TA- | ATG/T-- | ATG/TAG | ATG/TA- | ATG/T-- | ATG/T-- | ATG/TAA | ATG/TAA | ATG/TAG |
| 4    | ATG/TAA                                          | ATG/TAA | ATG/AGA | ATG/T-- | ATG/TA- | ATG/T-- | ATG/TAG | ATG/TA- | ATG/T-- | ATG/T-- | ATG/TAA | ATG/TAA | ATG/TAA |
| 5    | ATG/TAA                                          | ATG/TAA | ATG/AGA | ATG/T-- | ATG/TA- | ATG/T-- | ATG/TAG | ATG/TA- | ATG/T-- | ATG/T-- | ATG/TAA | ATG/TAA | ATG/TAA |
| 6    | ATG/TA-                                          | ATG/TAA | GTG/AGG | ATG/T-- | ATG/TA- | ATG/T-- | ATG/TAA | ATG/TA- | ATG/T-- | ATG/T-- | ATG/TAA | ATG/TAG | ATG/TAA |
| 7    | ATG/TAA                                          | ATG/TAG | GTG/TAA | ATG/T-- | ATG/T-- | ATG/T-- | ATG/TAA | ATG/T-- | ATG/T-- | ATG/T-- | ATA/TAA | ATG/TAA | ATG/TAA |
| 8    | ATG/TAA                                          | ATG/TAG | GTG/AGG | ATG/T-- | ATG/TA- | ATG/T-- | ATG/TAG | ATG/TA- | ATG/T-- | ATG/T-- | ATG/TAA | ATG/TAA | ATG/TAG |
| 9    | ATG/TAA                                          | ATG/TAA | GTG/TAA | ATG/T-- | ATG/TA- | ATG/T-- | ATG/TAA | ATG/TAA | ATG/TAG | ATG/T-- | ATG/TAA | ATG/TAA | ATG/TAA |
| 10   | ATG/TA-                                          | ATG/TAA | GTG/TAA | ATG/T-- | ATG/TA- | ATG/T-- | ATG/TAA | ATG/TAA | ATG/TAG | ATG/T-- | ATG/TAA | ATG/TAG | ATG/TAA |
| 11   | ATG/TAA                                          | ATG/TAA | GTG/TAA | ATG/T-- | ATG/TA- | ATG/T-- | ATG/TAG | ATG/TA- | ATG/TAG | ATG/T-- | ATG/TAA | ATG/TAA | ATG/TAA |
| 12   | ?/TA-                                            | ATG/TAA | GTG/TAA | ATG/T-- | ATG/TA- | ATG/T-- | ATG/TAA | ATG/TA- | ATG/T-- | GTG/T-- | ATG/TAA | ATG/TAA | ATG/TAG |
| 13   | ATG/TAA                                          | ATG/TAA | GTG/TAA | ATG/TA- | ATG/TA- | ATG/T-- | ATG/TAA | ATG/TAA | ATG/T-- | ATG/T-- | GTG/TAA | ATG/TAA | ATG/TAG |
| 14   | ATG/TA-                                          | ATG/TAA | GTG/TAA | ATG/T-- | ATG/TA- | ATG/T-- | ATG/TAA | ATG/TA- | ATG/T-- | ATG/T-- | ATG/TAA | ATG/TAG | ATG/TAA |
| 15   | ATG/TA-                                          | ATG/TAA | GTG/TAA | ATG/T-- | ATG/TA- | ATG/T-- | ATG/TAA | ATG/TA- | ATG/T-- | ATG/T-- | ATG/TAA | ATG/TAG | ATG/TAA |
| 16   | ATG/TA-                                          | ATG/TAA | GTG/TAA | ATG/TAG | ATG/TA- | ATG/T-- | ATG/TAG | ATG/TA- | ATG/T-- | ATG/T-- | ATG/TAA | ATG/TAG | ATG/TAA |
| 17   | ATG/TA-                                          | ATG/TAA | GTG/TAA | ATG/T-- | ATG/TA- | ATG/T-- | ATG/TAA | ATG/TA- | ATG/T-- | ATG/T-- | ATG/TAA | ATG/TAA | ATG/TAG |
| 18   | ATG/TAA                                          | ATG/TAA | GTG/TAA | ATG/T-- | ATG/TAG | ATG/T-- | ATG/TAG | ATG/TA- | ATG/TAG | ATG/T-- | ATG/TAA | ATG/TAA | ATG/TAG |
| 19   | ATG/TA-                                          | ATG/TAA | GTG/TAA | ATG/T-- | ATG/TA- | ATG/T-- | ATG/TAA | ATG/TA- | ATG/T-- | ATG/T-- | ATG/TAA | ATG/TAA | ATG/TAG |
| 20   | ?/TA-                                            | ATG/TAA | GTG/T-- | ATG/T-- | ATG/TA- | ATG/T-- | ATG/TAA | ATG/TA- | ATG/T-- | ATG/T-- | ATG/TAA | ATG/TAA | ATG/TAG |
| 21   | ATG/TAA                                          | ATG/T-- | GTG/TAA | ATG/T-- | ATG/TAA | ATG/T-- | ATG/TAA | ATG/TA- | ATG/T-- | ATG/T-- | ATG/TAA | ATG/TAA | ATG/AGA |
| 22   | ATG/TA-                                          | ATG/TAA | GTG/TAA | ATG/T-- | ATG/TA- | ATG/T-- | ATG/TAA | ATG/TA- | ATG/T-- | ATG/T-- | ATG/TAA | ATG/TAA | ATG/TAG |
| 23   | ATG/TAA                                          | ATG/TAA | GTG/AGG | ATG/T-- | ATG/TAA | ATG/T-- | ATG/TAA | ATG/TAA | ATG/TAG | ATG/T-- | ATG/TAA | ATG/TAA | ATG/TAA |

Notes: 1: *Larimichthys crocea* 2: *Larimichthys polyactis* 3: *Mitichthys miyu* 4: *Collichthys lucida* 5: *Collichthys niveatus* 6: *Doederleinia berycoidea* 7: *Trachurus trachurus* 8: *Spicara maena* 9: *Micropterus salmoides* 10: *Hemiochus diphreutus* 11: *Emmelichthys struhsakeri* 12: *Parapristipoma trilineatum* 13: *Lates calcarifer* 14: *Lethrinus obsoletus* 15: *Luijanus rivulatus* 16: *Pterocaesio tile* 17: *Monodactylus argenteus* 18: *Etheostoma radiosum* 19: *Chaetodontoplus septentrionalis* 20: *Labracinus cyclophthalmus* 21: *Plectropomus leopardeus* 22: *Coreoperca kawamebari* 23: *Pagrus auriga*. The interrogation shows for non-determined initiation condons.
