# Supplementary material
Source: PubMed Central journal article supplement (PMC3313511)
Supplement: gmb-35-1-191-suppl5.pdf [file gmb-35-1-191-suppl5.pdf]

Table S5 - Consensus sequences of conserved domains in control region of Percoidei species.

| Conserved domains | Consensus sequences     |
|-------------------|-------------------------|
| CSB-F             | ATGYAGTAAGARCCCKACCAWCM |
| CSB-E             | AGGGRCAA----WB-GTGGGG   |
| CSB-D             | TATTVCTGRCAWYTGGYTCCT   |
| CSB-1             | ATT-TCA-G--CATA--       |
| CSB-2             | A-CCCCCCTACCCCC         |
| CSB-3             | AAACCCCC----AAACAG      |
