# Supplementary material
Source: PubMed Central journal article supplement (PMC3313511)

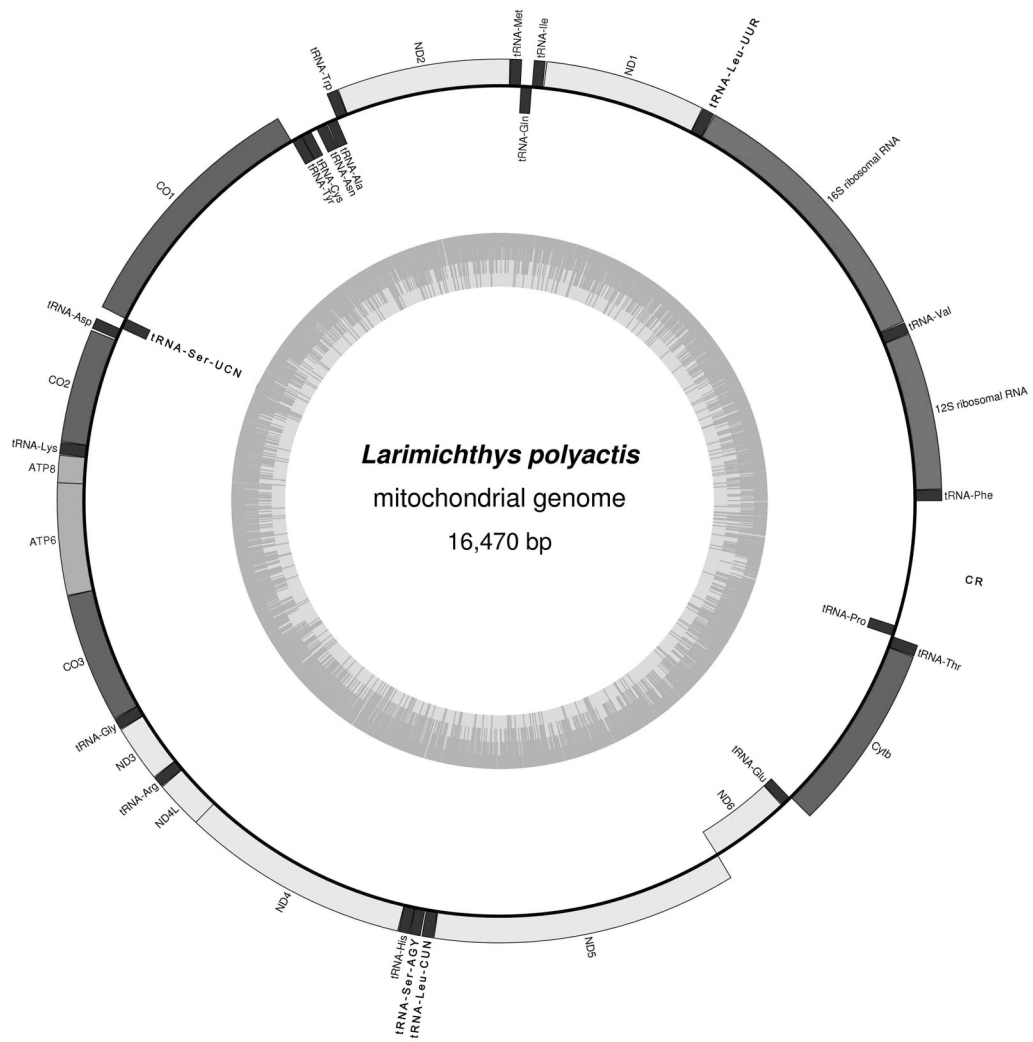

Figure S1 - Gene map of the *L. polyactis* mitochondrial genome.

Supplement: gmb-35-1-191-gfigsuppl1.pdf [file gmb-35-1-191-gfigsuppl1.pdf]
